# Supplementary material for: Effect of magnesium and calcium ions on the strength and biofunctionality of GelMA/SAMA composite hydrogels
Source: Royal Society of Chemistry journal article supplement (doi:10.1039/d4tb00666f), 2024-01-01
Supplement: d4tb00666f1.pdf [file d4tb00666f1.pdf]

## Effect of magnesium and calcium ions on the strength and biofunctionality of GelMA/SAMA composite hydrogels

Hongbiao Zhang<sup>1</sup>, Ran Yu<sup>1</sup>, Yuhao Xia, Jiawei Liu, Rong Tu, Ji Shi · Honglian Dai \*

State Key Laboratory of Advanced Technology for Materials Synthesis and Processing Biomedical Materials and Engineering Research Center of Hubei Province, Wuhan University of Technology, Wuhan 430070, China

E-mail: [daihonglian@whut.edu.cn](mailto:daihonglian@whut.edu.cn) (H. Dai).

Telephone number: 13697333860 (H. Dai)

<sup>1</sup> These two authors contributed equally to this project

This file includes:

- Fig. S1. (A) Mechanical properties of GelMA at different concentrations; (B) Cell viability of BMSCs in different concentrations of GelMA co culture systems; (C) ADTC5 cell viability in different concentrations of GelMA co culture systems.
- Fig. S2. The stress-strain curves (A), the morphology image (B) and the compressive strength of photocrosslinked hydrogels, (the scale bar is 500  $\mu\text{m}$ ).
- Fig. S3. (A) Effect of  $\text{Ca}^{2+}$  introduction method on mechanical properties of materials; (B) Hydrogel microstructure; (C) Compressive strength of double crosslinked hydrogel (500  $\mu\text{m}$  scale in the figure).
- Fig. S4. (A) Hofmeister ion sequence, (B) the effect of  $\text{MgSO}_4$  on mechanical properties of GelMA, and (C) digital photos of GelMA hydrogels with different  $\text{MgSO}_4$  contents.
- Fig. S5. Three interval thixotropy test.

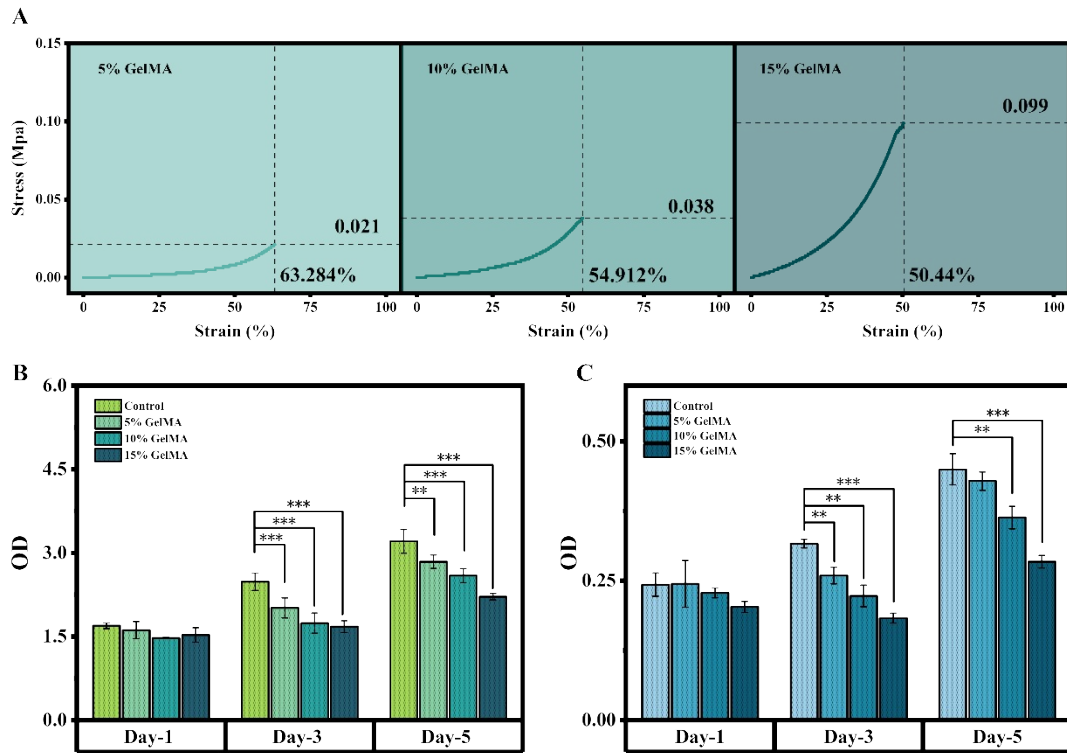

Fig. S1 (A) Mechanical properties of GelMA at different concentrations; (B) Cell viability of BMSCs in different concentrations of GelMA co culture systems; (C) ADTC5 cell viability in different concentrations of GelMA co culture systems

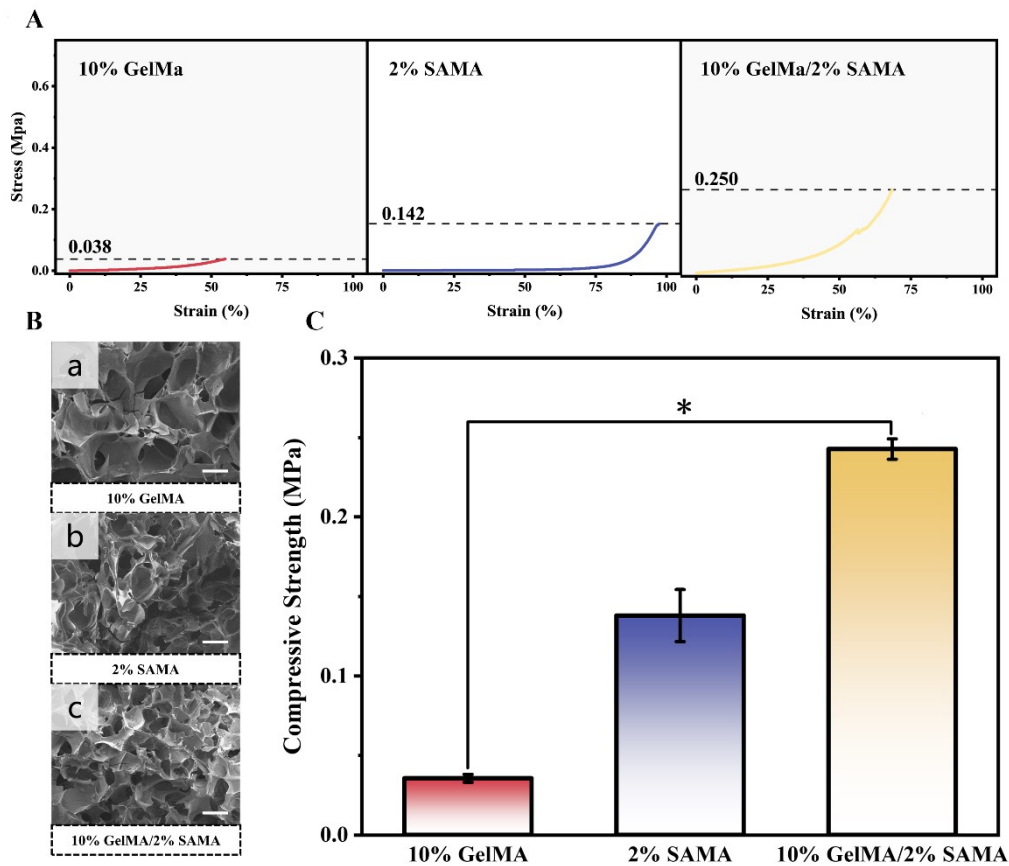

Fig. S2 The stress-strain curves (A), the morphology image (B) and the compressive strength of photocrosslinked hydrogels, (the scale bar is 500  $\mu\text{m}$ ).

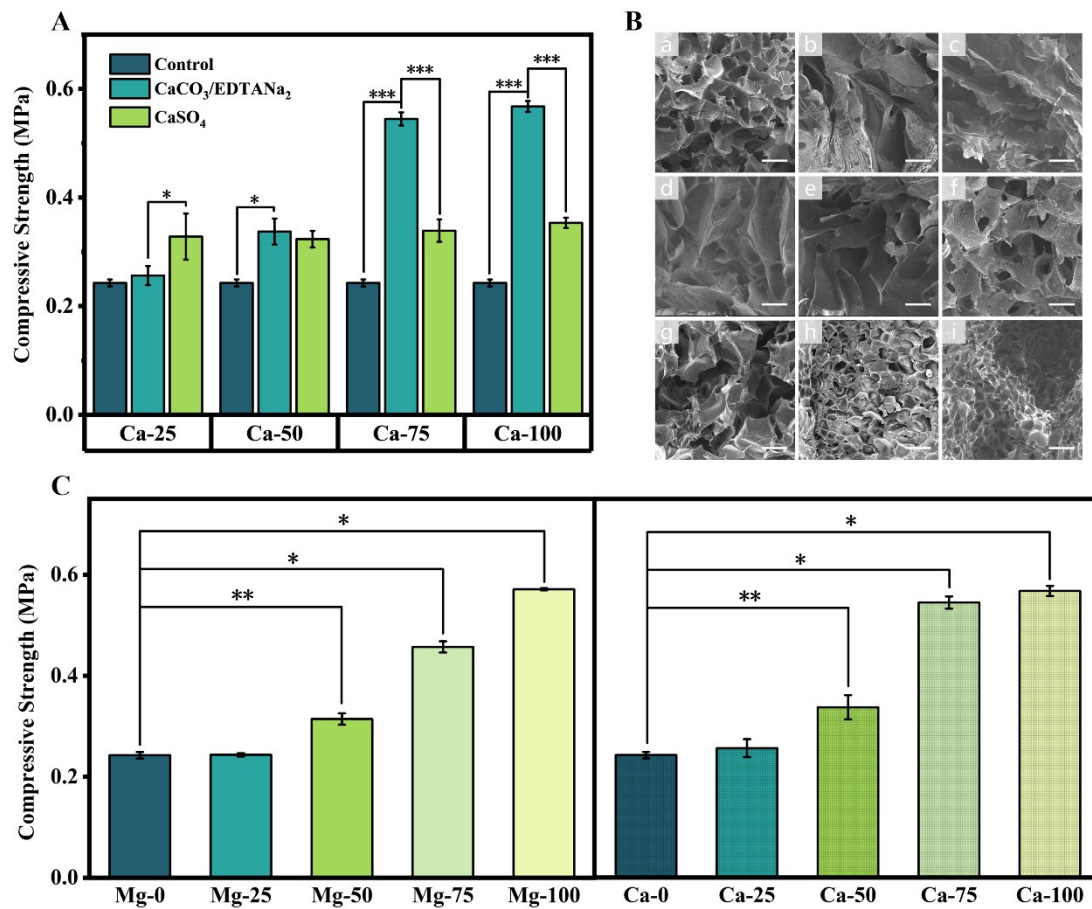

Fig. S3 (A) Effect of Ca<sup>2+</sup> introduction method on mechanical properties of materials; (B) Hydrogel microstructure (a is SEM of 10% GelMA/2% SAMA, B-E is SEM of Ca-25, Ca-50, Ca-75 and Ca-100 with ions introduced by CaSO<sub>4</sub> method, respectively. f-i is the SEM images of Ca-25, Ca-50, Ca-75 and Ca-100 introduced ions by CaCO<sub>3</sub>/EDTANA<sub>2</sub> method, respectively; (C) Compressive strength of double crosslinked hydrogel (500 μm scale in the figure).

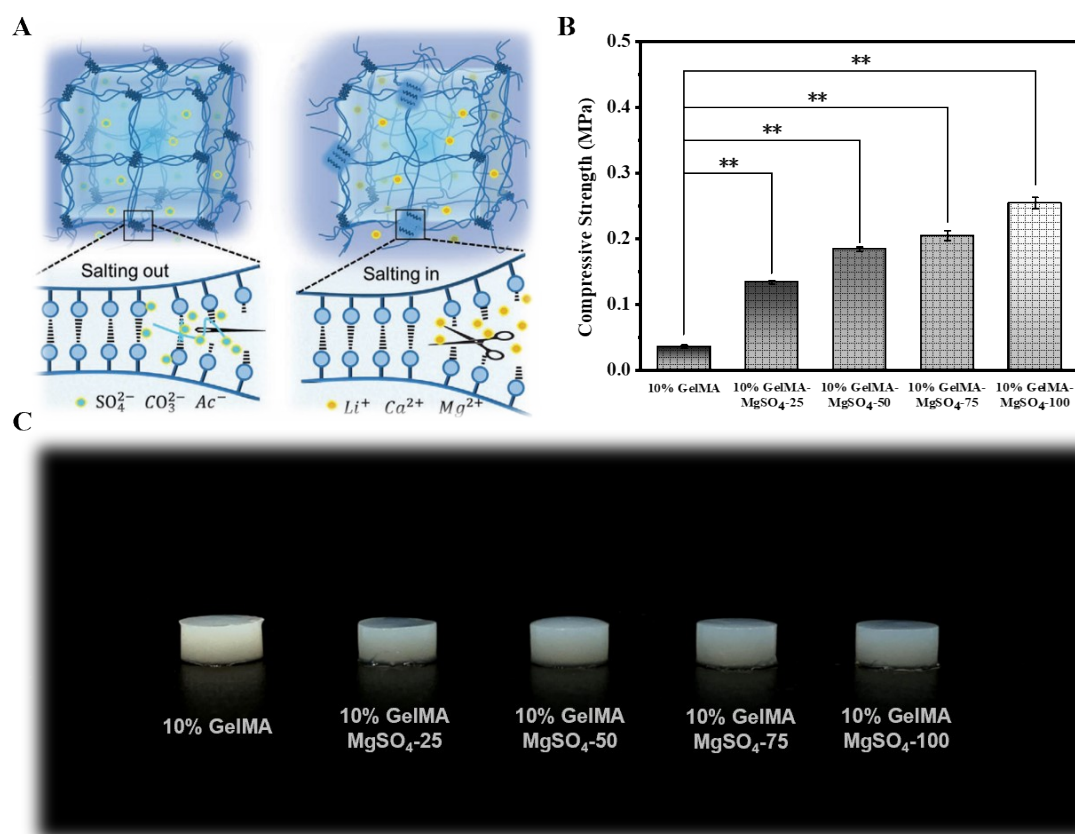

Fig. S4 (A) Hofmeister ion sequence, (B) the effect of  $\text{MgSO}_4$  on mechanical properties of GelMA, and (C) digital photos of GelMA hydrogels with different  $\text{MgSO}_4$  contents.

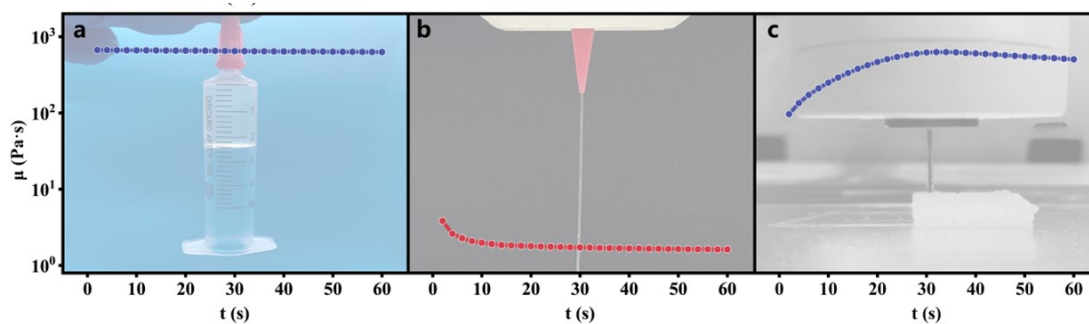

Fig. S5 Three interval thixotropy test.
